# Supplementary material for: Copper supported modified magnetic carrageenan as a bio-based catalyst for the synthesis of novel scaffolds bearing the 1,2,3-triazole unit through the click reaction
Source: Royal Society of Chemistry journal article supplement (doi:10.1039/d4na00022f), 2024-01-01

## Supporting information

### **Copper supported modified magnetic carrageenan as a bio-based catalyst for the Synthesis of novel scaffolds bearing 1,2,3-triazole unit through click reaction**

Nima Khaleghi<sup>1</sup>, Maryam Esmkhani<sup>2</sup>, Milad Noori<sup>2</sup>, Navid Dastyafteh<sup>2</sup>, Minoo Khalili Ghomi<sup>1</sup>  
Mohammad Mahdavi<sup>1</sup>, Mohammad Hosein Sayahi<sup>3\*</sup>, Shahrzad Javanshir<sup>2\*</sup>

*<sup>1</sup>Endocrinology and Metabolism Research Center, Endocrinology and Metabolism Clinical Sciences Institute, Tehran University of Medical Sciences, Tehran, Iran*

*<sup>2</sup>Pharmaceutical and Heterocyclic Compounds Research Laboratory, Department of Chemistry, Iran University of Science and Technology, Tehran, 16846-13114, Iran*

*<sup>3</sup>Department of Chemistry, Payame Noor University, Tehran, Iran*

# $^1\text{H}$ NMR and $^{13}\text{C}$ NMR (400 MHz, $\text{DMSO-}d_6$ ) of compound 4a

Dr. Mahdavi.701.fid  
1H NMR- Dr. Mahdavi SAH-

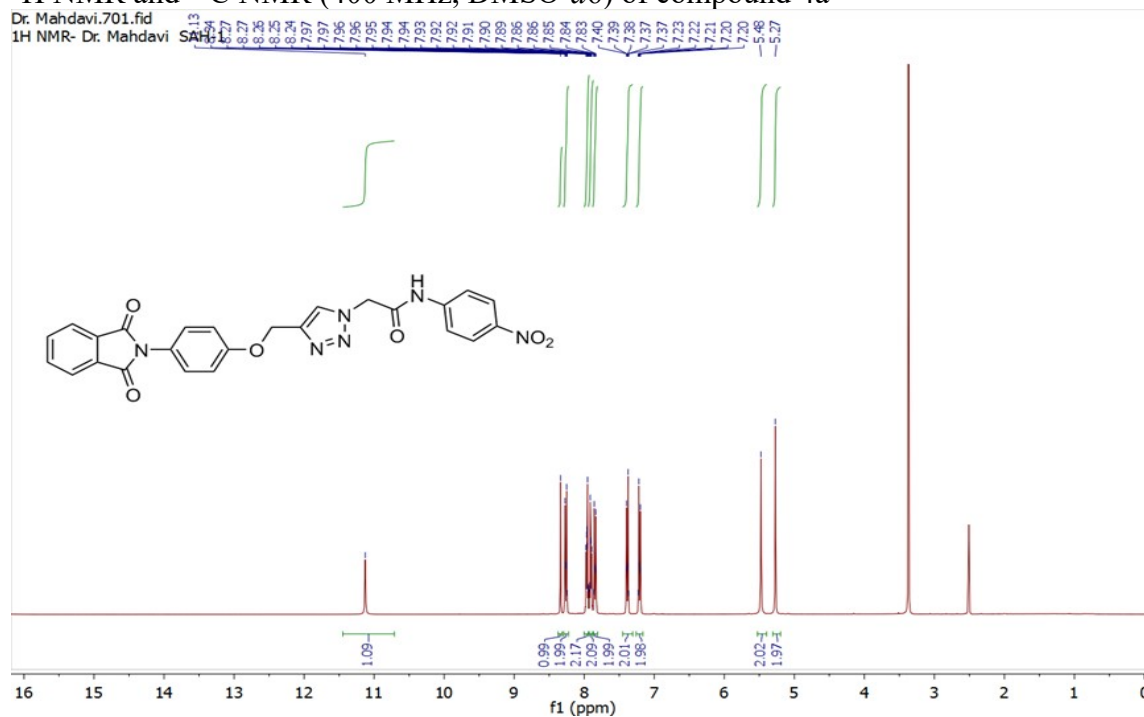

Dr. Mahdavi.702.fid  
13C NMR- Dr. Mahdavi SAH-

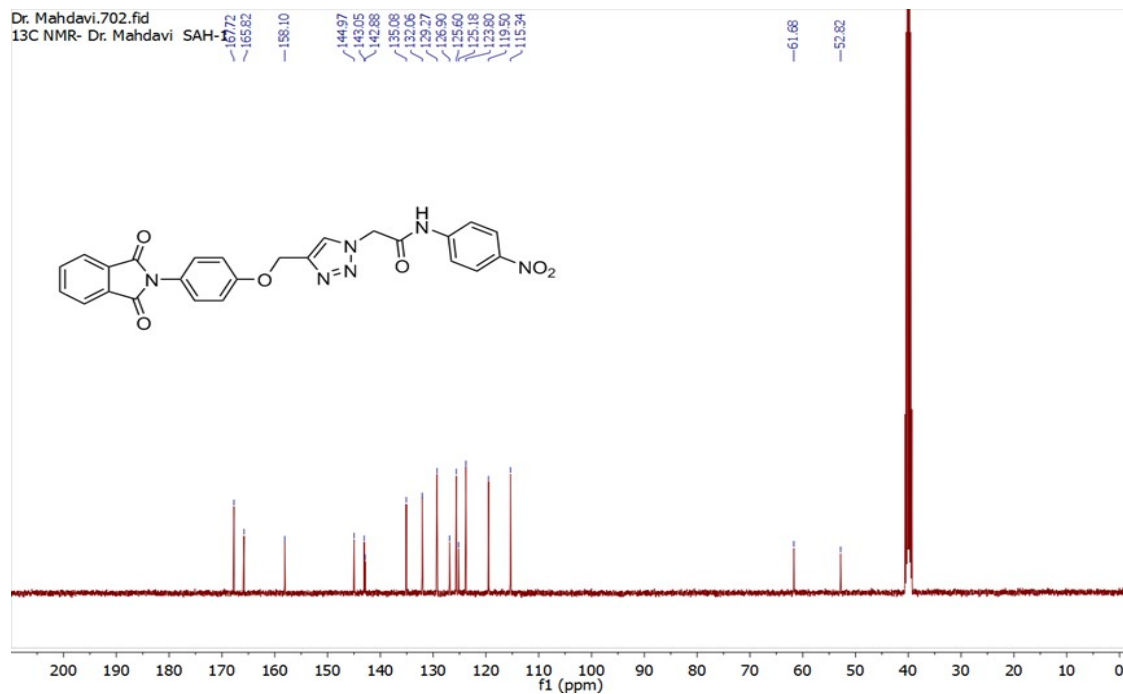

$^1\text{H}$  NMR and  $^{13}\text{C}$  NMR (400 MHz,  $\text{DMSO-}d_6$ ) of compound 4b

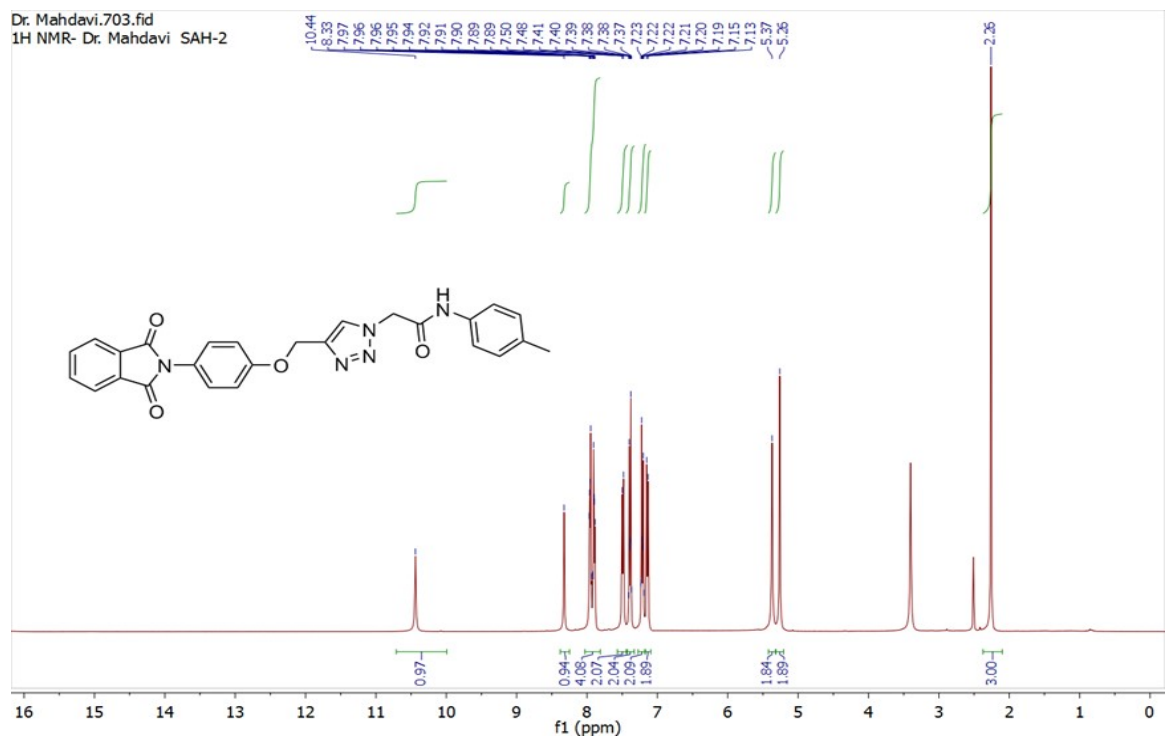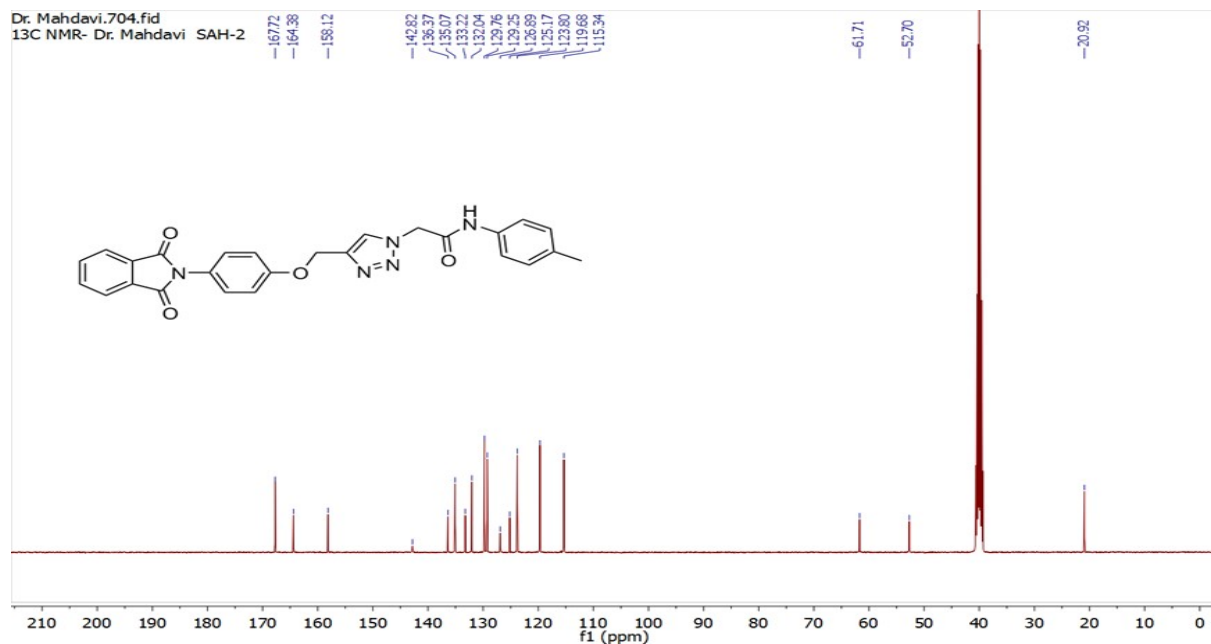

$^1\text{H}$  NMR and  $^{13}\text{C}$  NMR (400 MHz,  $\text{DMSO-}d_6$ ) of compound 4c

Dr. Mahdavi.713.fid  
1H NMR- Dr. Mahdavi SAH-7

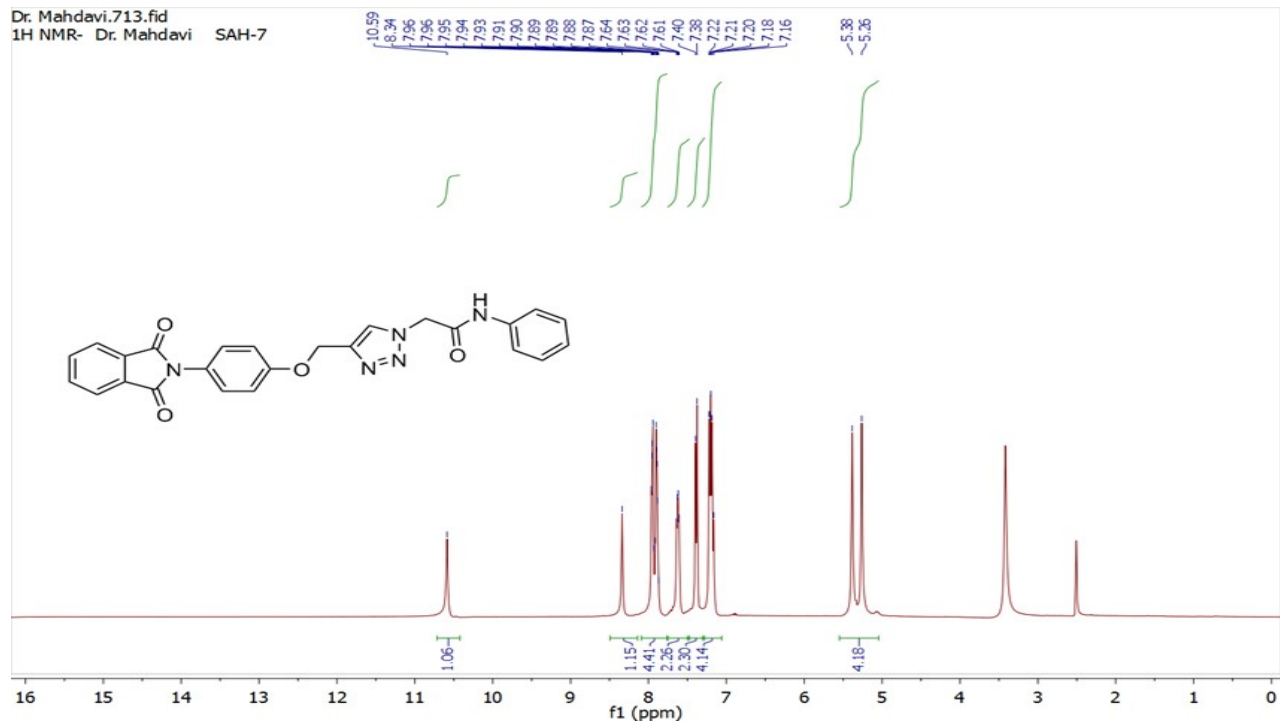

Dr. Mahdavi.7144.fid  
13C NMR- Dr. Mahdavi SAH-7

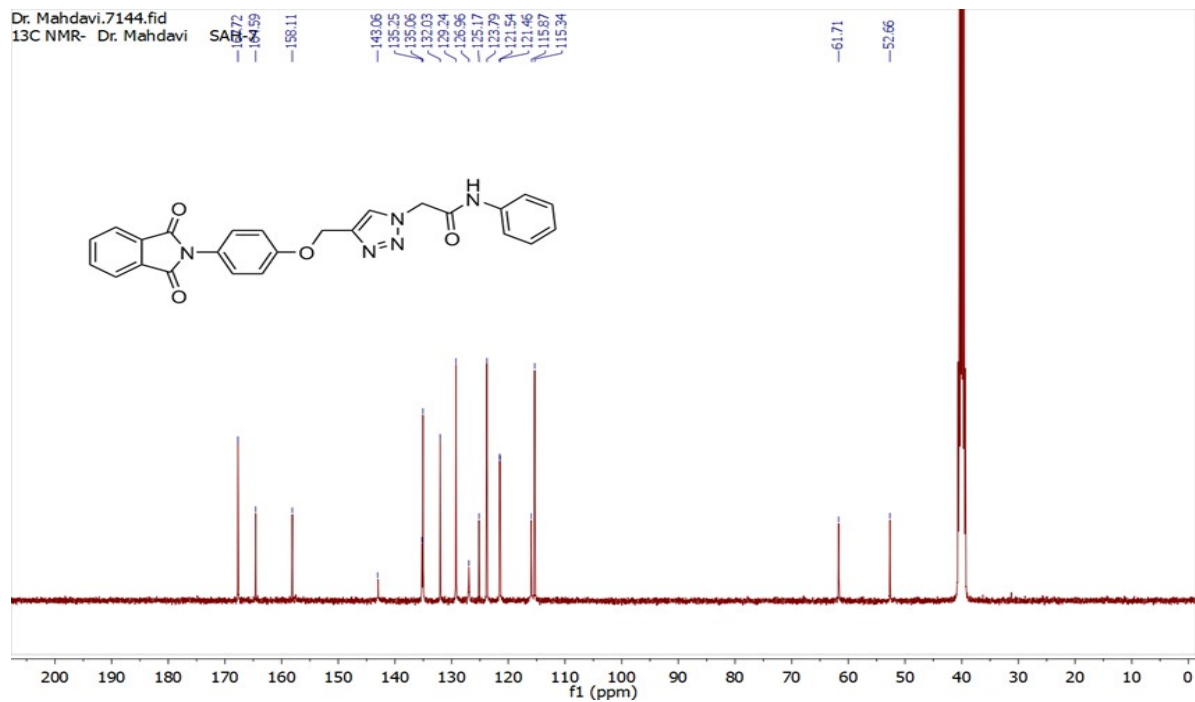

$^1\text{H}$  NMR and  $^{13}\text{C}$  NMR (400 MHz,  $\text{DMSO-}d_6$ ) of compound 4e

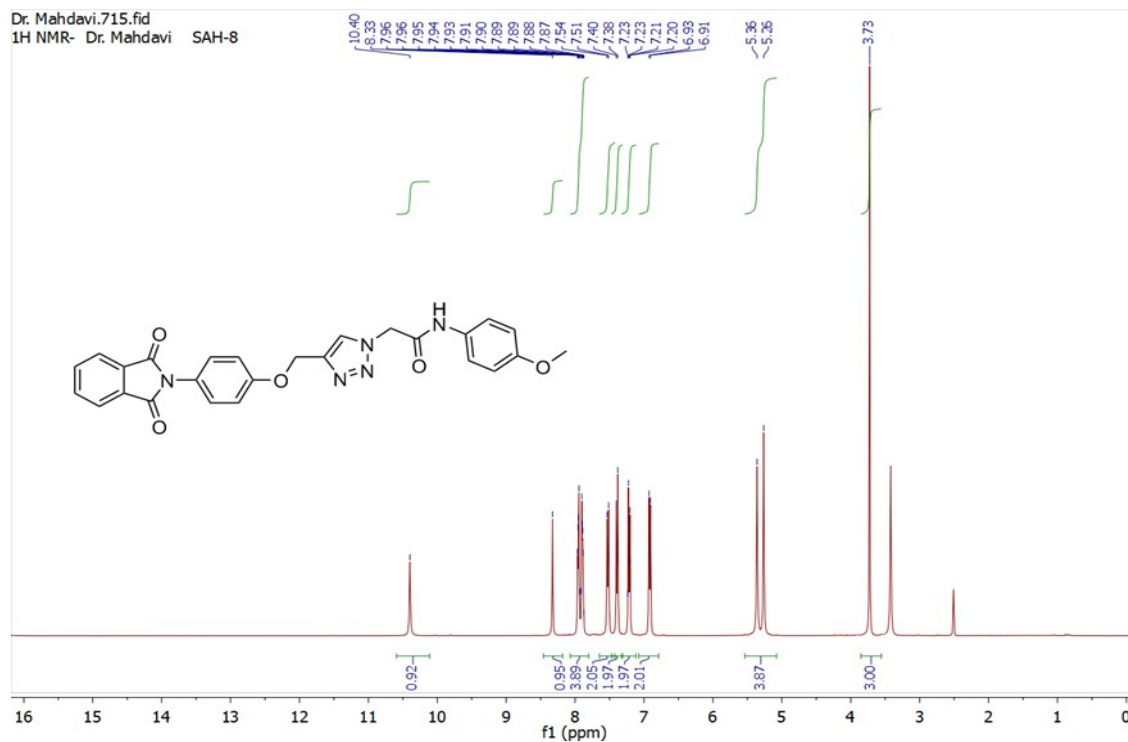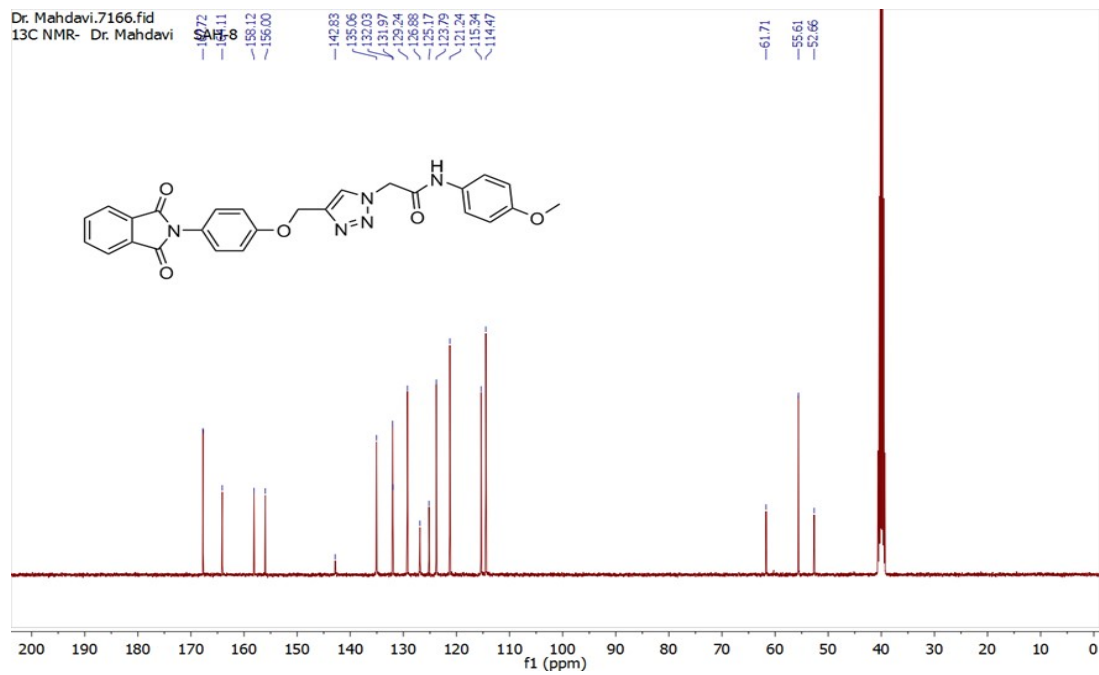

$^1\text{H}$  NMR and  $^{13}\text{C}$  NMR (400 MHz,  $\text{DMSO-}d_6$ ) of compound 4d

Dr. Mahdavi.721.fid  
1H NMR- Dr. Mahdavi SAH-11

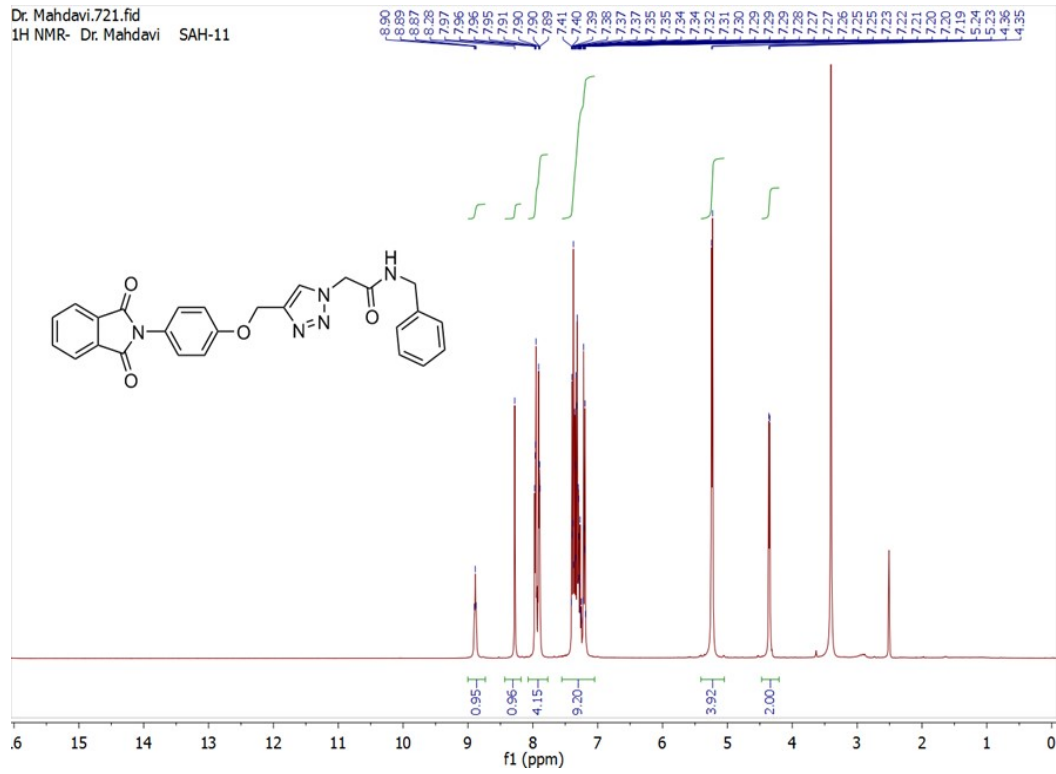

Dr. Mahdavi.722.fid  
13C NMR- Dr. Mahdavi SAH-11

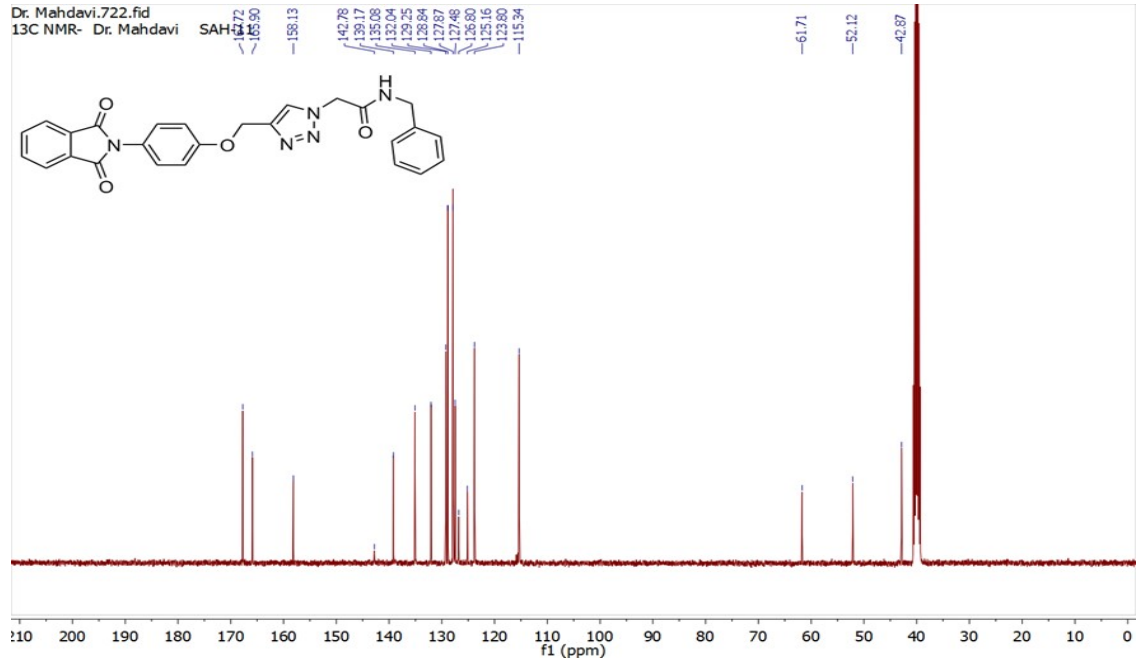

<sup>1</sup>H NMR (400 MHz, DMSO-d<sub>6</sub>) of compound 5e

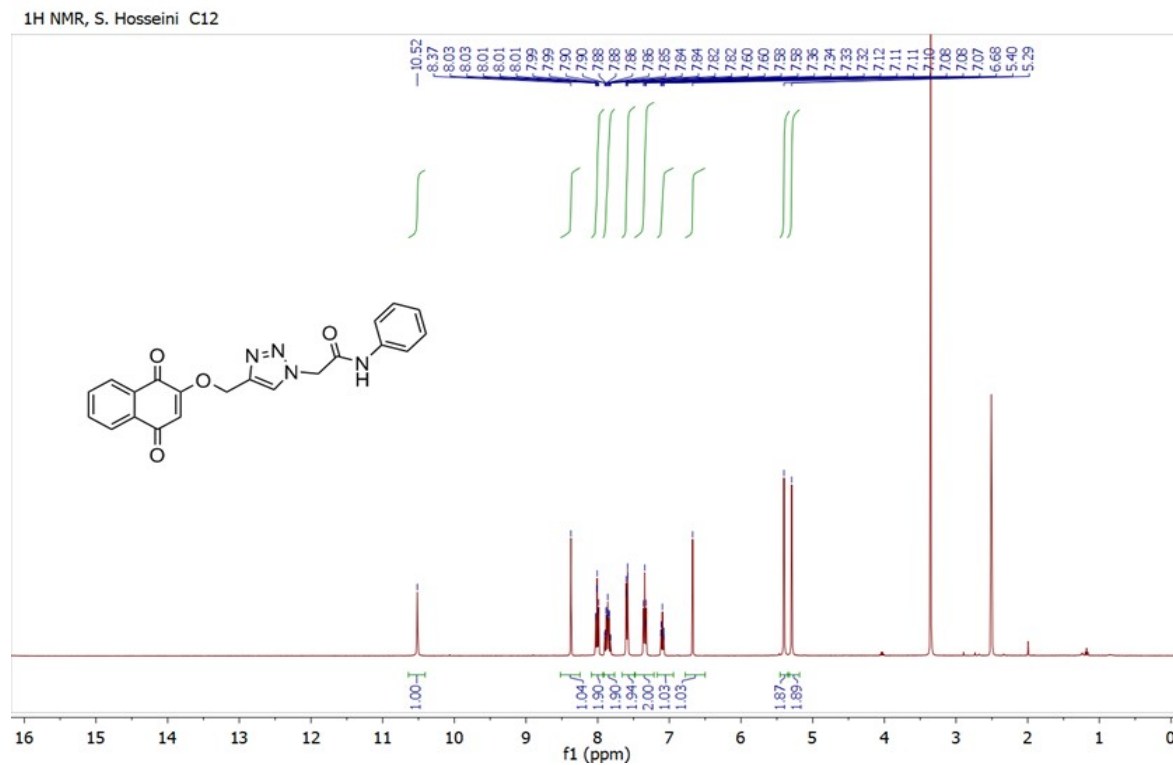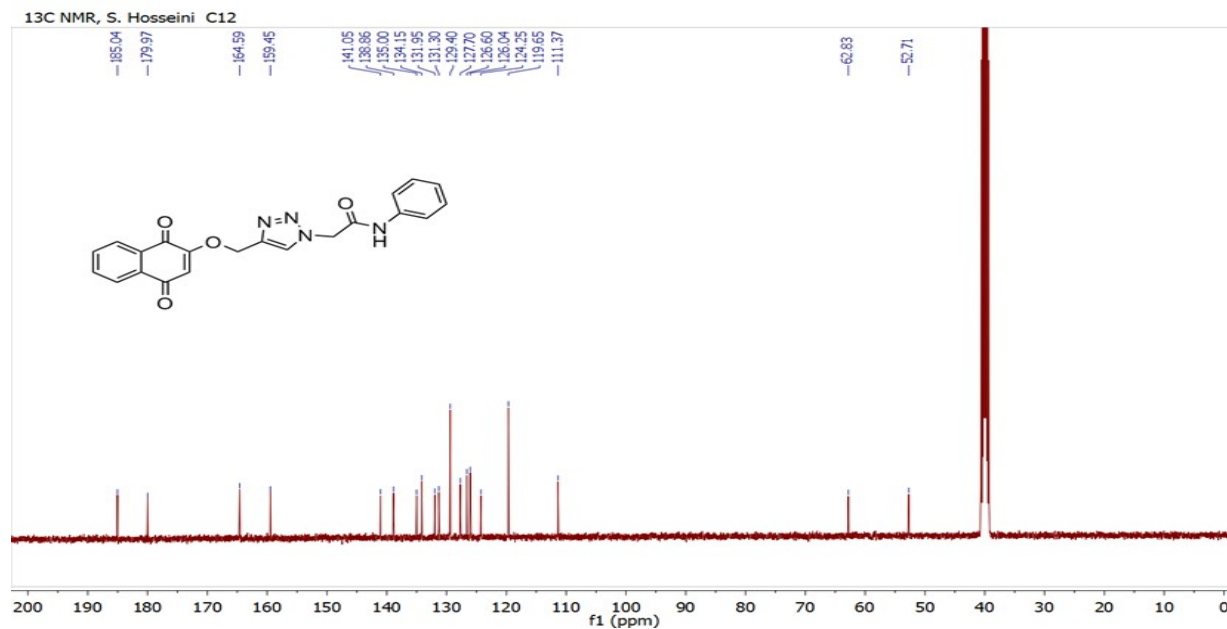

$^1\text{H}$  NMR and  $^{13}\text{C}$  NMR (400 MHz,  $\text{DMSO-}d_6$ ) of compound 5a

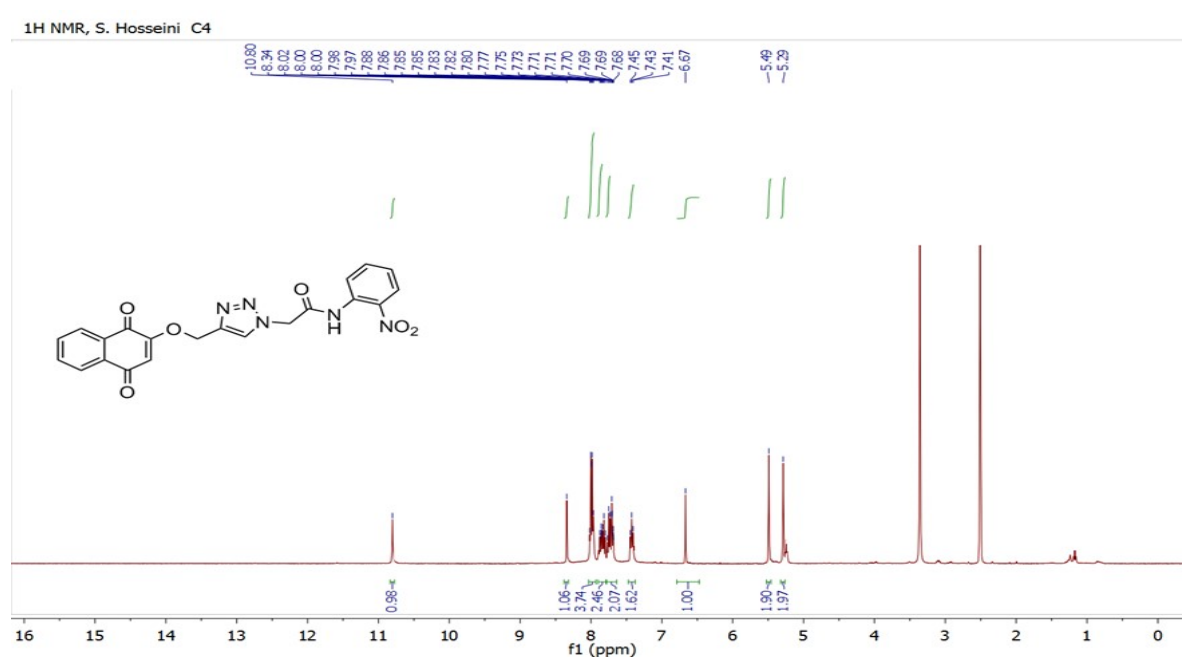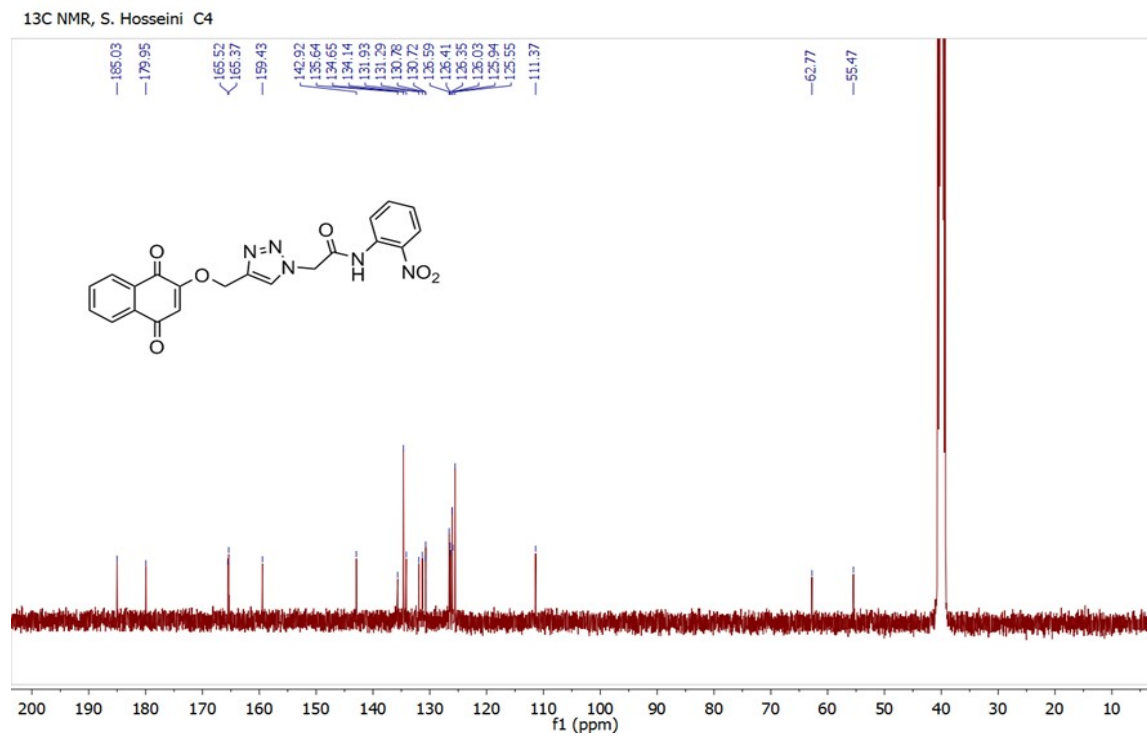



# $^1\text{H}$ NMR and $^{13}\text{C}$ NMR (400 MHz, $\text{DMSO-}d_6$ ) of compound 5b

$^1\text{H}$  NMR, S. Hosseini C6

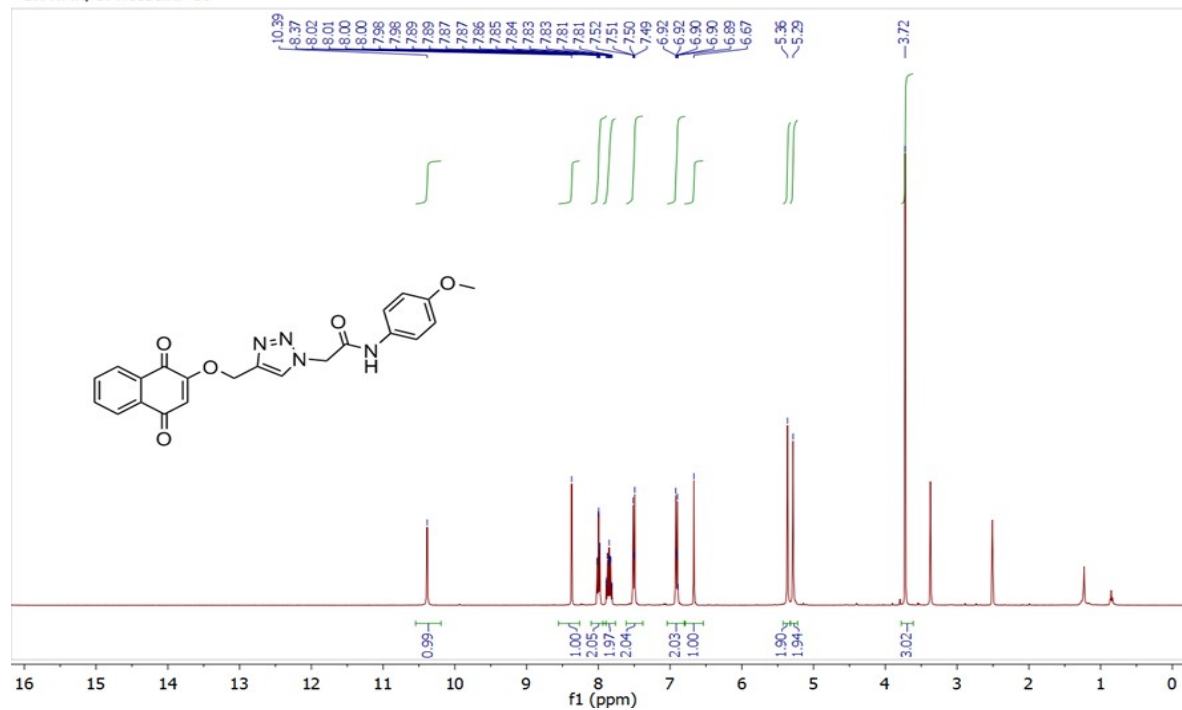

$^{13}\text{C}$  NMR, S. Hosseini C6

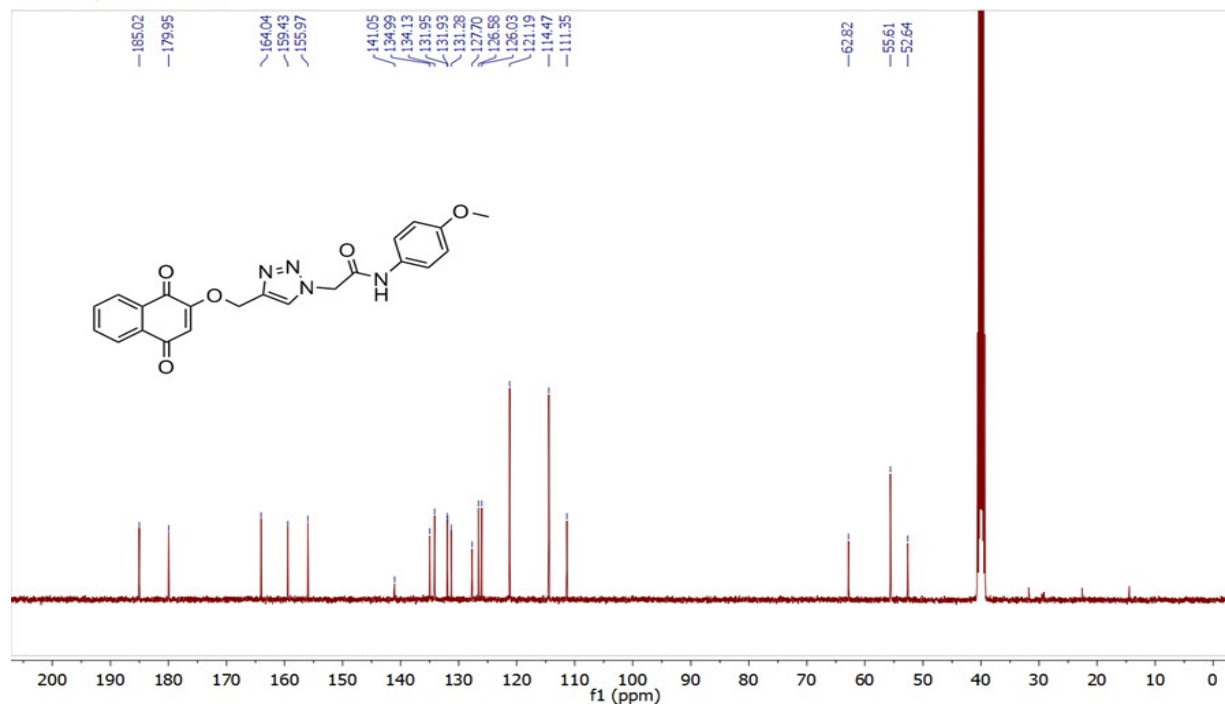

$^1\text{H}$  NMR and  $^{13}\text{C}$  NMR (400 MHz,  $\text{DMSO-}d_6$ ) of compound 5c

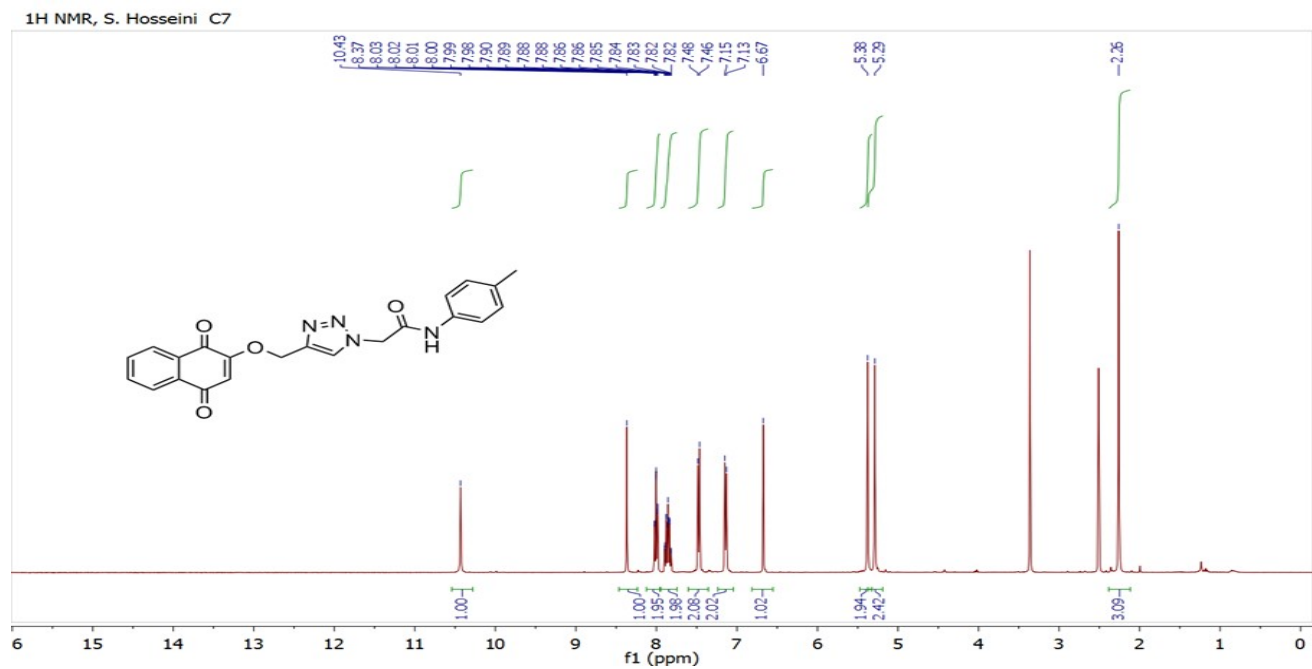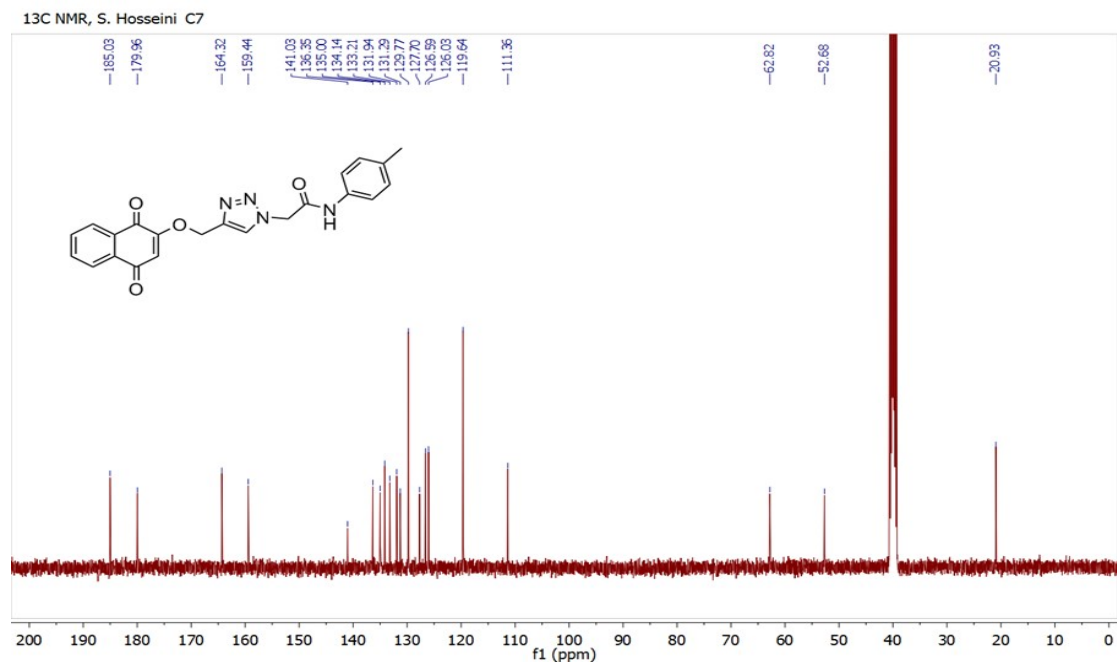

Supplement: d4na00022f1.pdf [file d4na00022f1.pdf]
